# Supplementary material for: Temporalities of oxytocin for labour augmentation: a mixed-methods study of time factors shaping labour practices in a busy maternity unit in Tanzania
Source: PubMed Central journal article supplement — BMC Pregnancy Childbirth. 2024 Aug 29;24:563. doi: 10.1186/s12884-024-06717-3 (PMC11363361; doi:10.1186/s12884-024-06717-3), 2024-08-29
Supplement: 12884_2024_6717_MOESM1_ESM.pdf [file 12884_2024_6717_MOESM1_ESM.pdf]

## Supplementary file 1: Observation sheet for structured observations

**Observation sheet:** NO = Not Observed, y=yes n=no, /= not applicable

Referral (y/n):

Date of admission:

Time of admission:

Cx dilatation on admission:

Date of opening the Partograph:

Time of opening the Partograph:

Cx dilatation when Partograph opened:

Date and time of delivery, stillbirth or CS:

|                                                                                                         |                                                       |
|---------------------------------------------------------------------------------------------------------|-------------------------------------------------------|
| Name of the mother / Hospital ID                                                                        |                                                       |
| Age of mother                                                                                           |                                                       |
| Risk factors: PIH, fever, APH, PROM, prev CS, cord, breech, multiple, shoulder dystocia, anemia, HIV... |                                                       |
| Parity                                                                                                  |                                                       |
| Gestational age                                                                                         |                                                       |
| Induced (No/balloon/misoprostol/oxytocin)                                                               |                                                       |
| <b>Time of oxytocin start:</b><br><b>Time of oxytocin stopped:</b>                                      | <b>Changes of rate can be documented on the back.</b> |
| Oxytocin used in first stage (y/n)<br>Cx dilatation (cm)                                                |                                                       |
| Oxytocin used in second stage (y/n)                                                                     |                                                       |
| Concentration used (units)**                                                                            | Prescribed/labelled:          Observed:               |
| Starting drop rate per 15 sec (number)                                                                  |                                                       |
| Maximum drop rate per 15 sec (number)                                                                   |                                                       |
| Bolus i.v. (y/n), units and 1approx. time                                                               |                                                       |
| Oxytocin documented in the case file (y/n)                                                              |                                                       |
| Oxytocin documented in report book                                                                      |                                                       |
| Oxytocin labeled (y/n)                                                                                  |                                                       |
| Fetal Heart rate monitored (time)**                                                                     |                                                       |
| Contractions monitored (time)**                                                                         |                                                       |

Birth weight:

| Apgar Score                   | 0                  | 1                             | 2                         | 1 min | 5 min | (10 min) |
|-------------------------------|--------------------|-------------------------------|---------------------------|-------|-------|----------|
| <b>Appearance</b>             | Blue/pale all over | Blue/pale extremities         |                           |       |       |          |
| <b>Pulse</b>                  | Absent             | < 100                         | >100                      |       |       |          |
| <b>Grimace on stimulation</b> | No response        | grimaces                      | Sneezes/coughs/pulls away |       |       |          |
| <b>Activity</b>               | Absent             | Arms/legs flexed              | Active                    |       |       |          |
| <b>Respiration</b>            | Absent             | Weak/slow irregular breathing | Good cry                  |       |       |          |
| <b>Total Apgar Score</b>      |                    |                               |                           |       |       |          |

**Outcome of the newborn (Y/N)**

Admission to neonatal unit(No. of days):

Neonatal death(day):

Transfer to Muhimbili (date):
